# Supplementary material
Source: publisher figshare collection journal article supplement (https://karger.figshare.com/ndownloader/files/26615657)
Supplement: Supplementary file 1 [file 26615657]

**Table S2. The clinical features for predicting renal replacement therapy-free survival (RRTFS).**

| - Age (years) - Gender (male, female) - Ethnicity (Asian, Black, Hispanic, White, other, unknown) - Medication list - Dose of vasopressors*: dopamine, dobutamine, norepinephrine, epinephrine, phenylephrine, vasopressin, milrinone - Duration of loop diuretic use (days) - Mean dose of received loop diuretic (mg/day) - Simplified Acute Physiology Score (SAPS) II (0-119) - Charlson comorbidities index (0-37) - Weight* (kg), height (inch) - Initial CRRT modes: CVVH, CVVHD, CVVHDF, unknown - Ventilator duration (days) - Urine output* (mL per 6 hours interval) - Glasgow coma scale* (3-15) - Body temperature* (Fahrenheit), heart rate* (beat per minute), arterial and non-arterial blood pressure* (systolic, diastolic, mean; mmHg), respiratory rate* (per minute) - Serum sodium*, potassium*, chloride*, bicarbonate* (mmol/L) - Serum calcium*, phosphate*, magnesium* (mg/dL) - Blood urea nitrogen* (mg/dL) - Serum creatinine* (mg/dL) - Blood glucose* (mg/dL) - Serum albumin*, globulin* (g/dL) - Aspartate aminotransferase*, alanine aminotransferase*, alkaline phosphatase*, gamma glutamyl transferase* (U/L) - Direct bilirubin*, indirect bilirubin*, total bilirubin* (mg/dL) - Hematocrit* (%), hemoglobin* (g/dL) - White blood cell count*, platelet count* (x 109/L) - International normalized ration (INR)* - Prothrombin time (PT)*, partial thromboplastin time (PTT)* (seconds) - D-dimer* (ng/mL) - pH* - PaCO2*, PaO2* (mmHg), oxygen alveolar-arterial gradient* (mmHg) - Arterial*, venous*, central venous oxygen saturation* (%) - Fractional of inspired oxygen (FiO2)* (%) - Serum lactate* (mmol/L) | - Comorbidities   - Hypertension   - Diabetes required insulin treatment   - Diabetes required oral medication treatment   - Coronary artery disease   - Congestive heart failure   - Arrhythmias   - Anemia   - Chronic obstructive pulmonary disease   - Alcoholism   - Liver failure   - Myocardial infarction   - Smoker   - Gastrointestinal bleeding   - Hepatitis   - Asthma |
| --- | --- |

*The time-dependent features for long short-term memory with multilayer perceptron (MLP+LSTM) model

CRRT, continuous renal replacement therapy; CVVH, continuous veno-venous hemofiltration; CVVHD, continuous veno-venous hemodialysis; CVVHDF, continuous veno-venous hemodiafiltration; HIV, human immunodeficiency virus
